# Supplementary material for: Genome-Wide Epigenetic Regulation of Gene Transcription in Maize Seeds
Source: PubMed Central journal article supplement (PMC4607434; doi:10.1371/journal.pone.0139582), 2015-10-15
Supplement: pone.0139582.s001.pdf [file pone.0139582.s001.pdf]

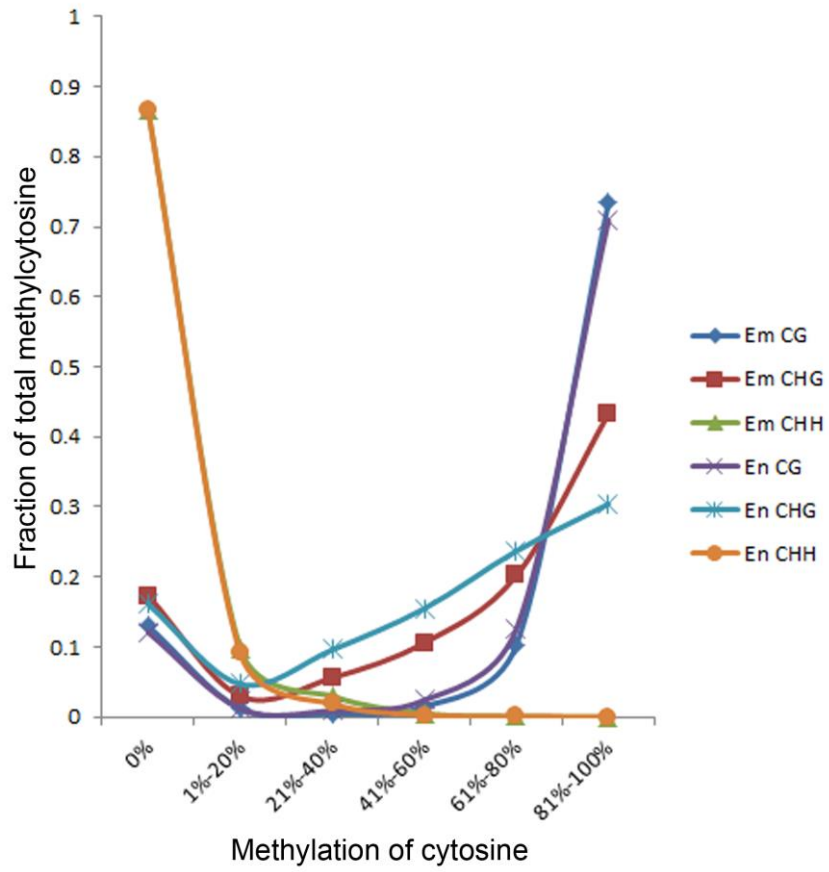

Figure A. Distribution of the percentage methylation in the CG, CHG and CHH contexts.

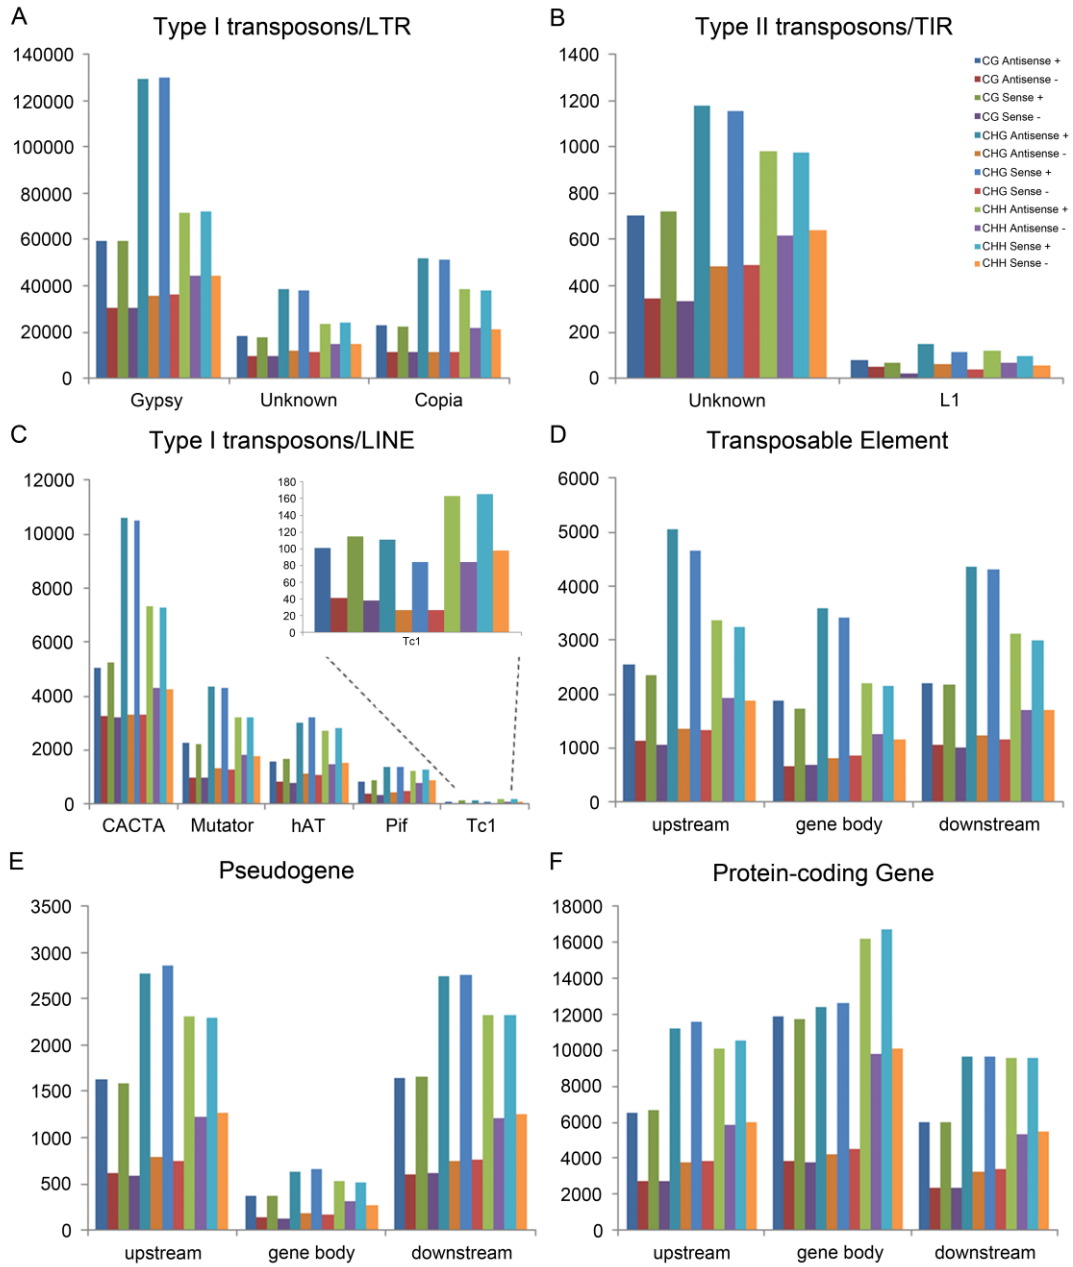

Figure B DMR distributions of transposons, transposable elements, pseudogenes, and protein-coding genes in the embryo and endosperm.

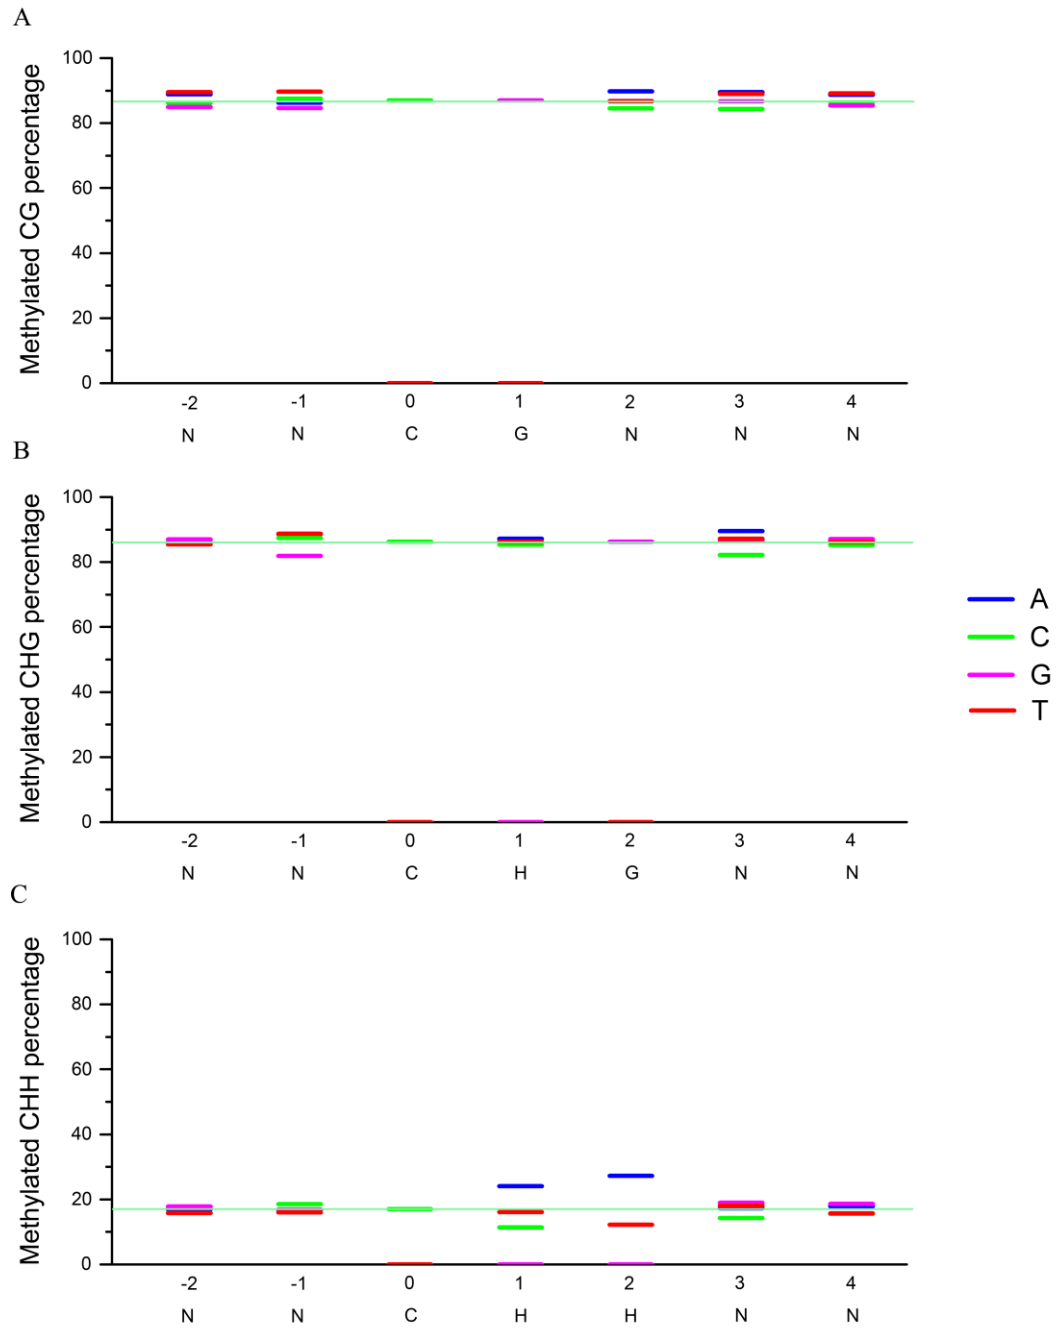

Figure C. Local sequence effects on DNA methylation in the endosperm.

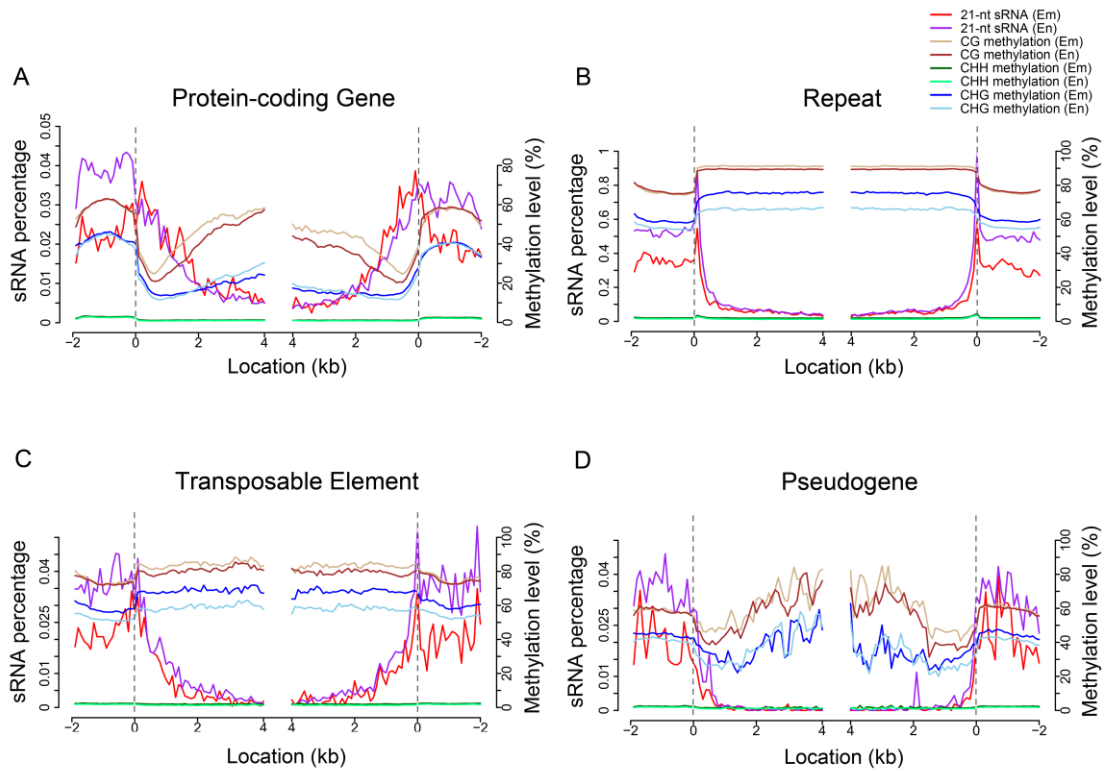

Figure D. Correlation between 21-nt sRNA and DNA methylation.

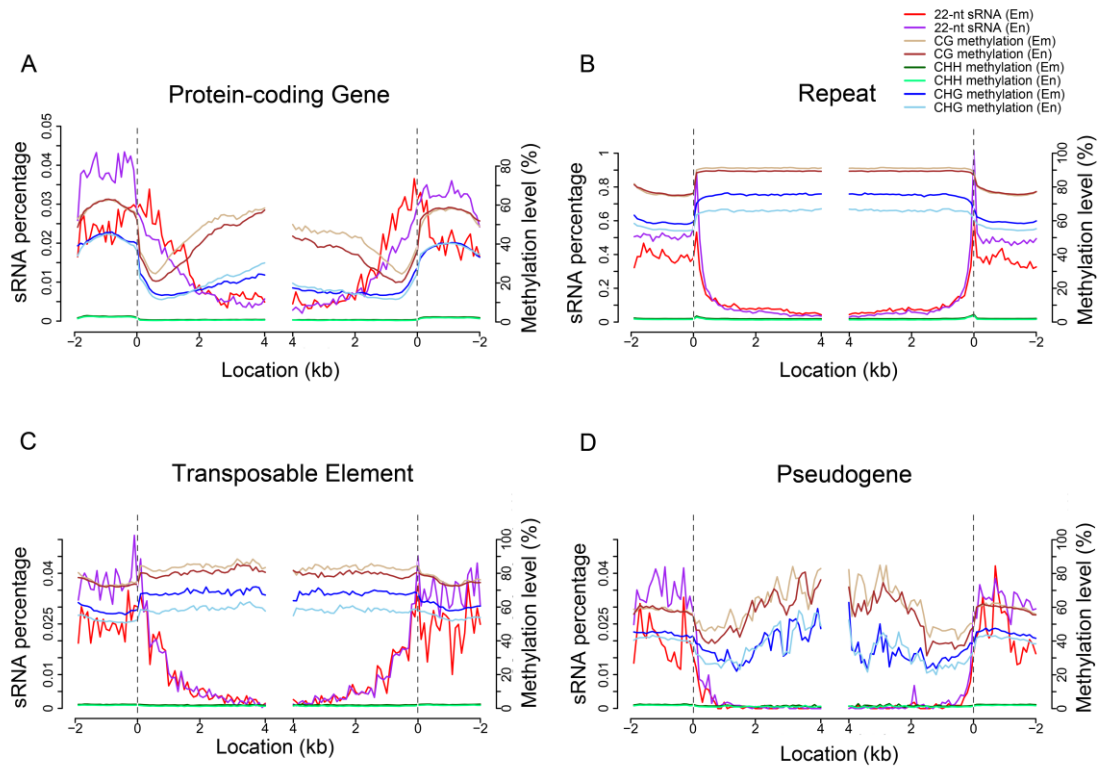

Figure E. Correlation between 22-nt sRNA and DNA methylation.

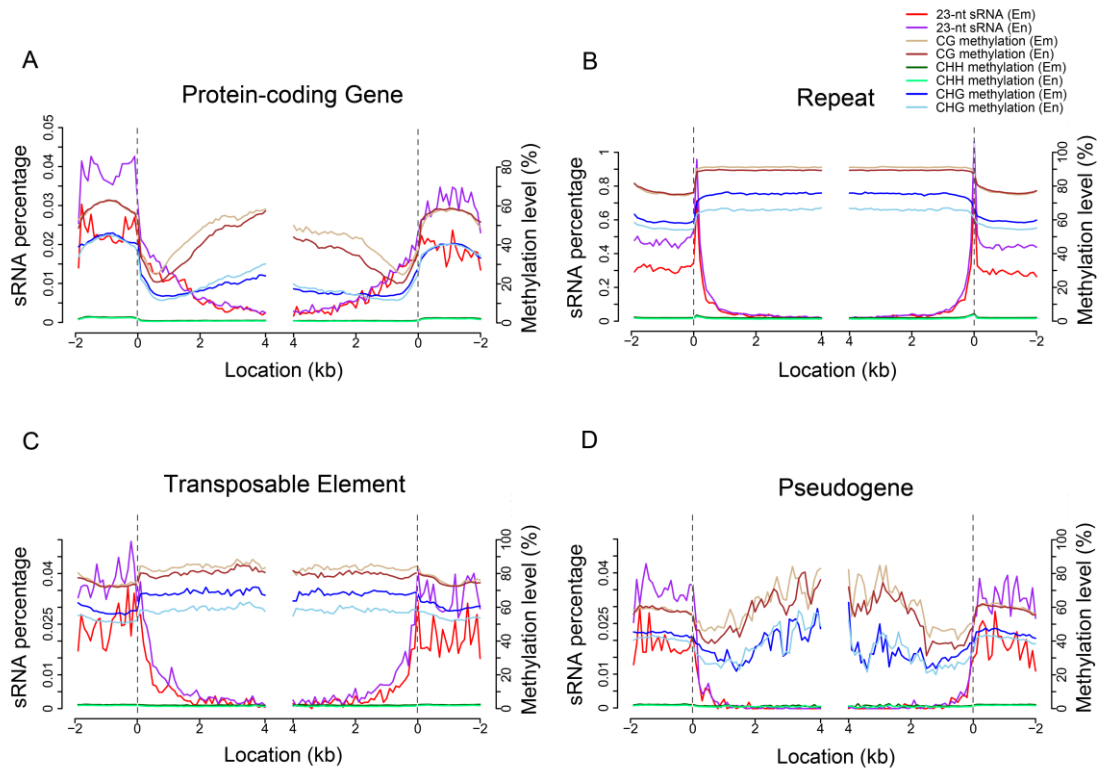

Figure F. Correlation between 23-nt sRNA and DNA methylation.

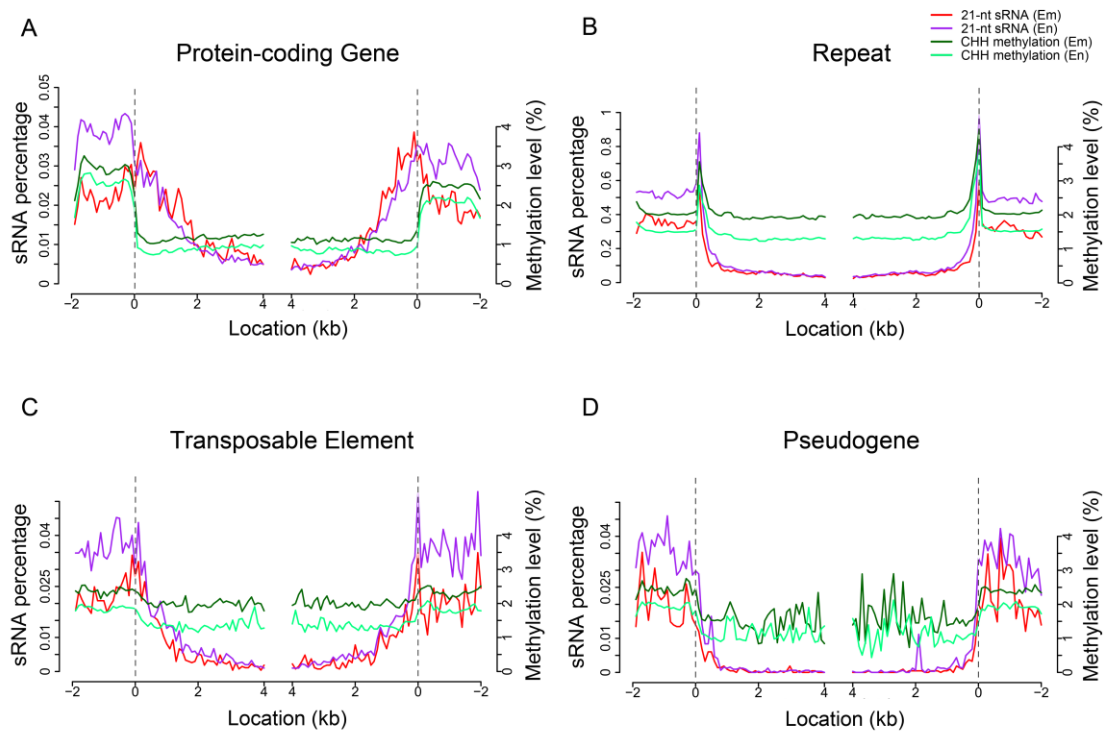

Figure G. Correlation between 21-nt sRNA and CHH methylation.

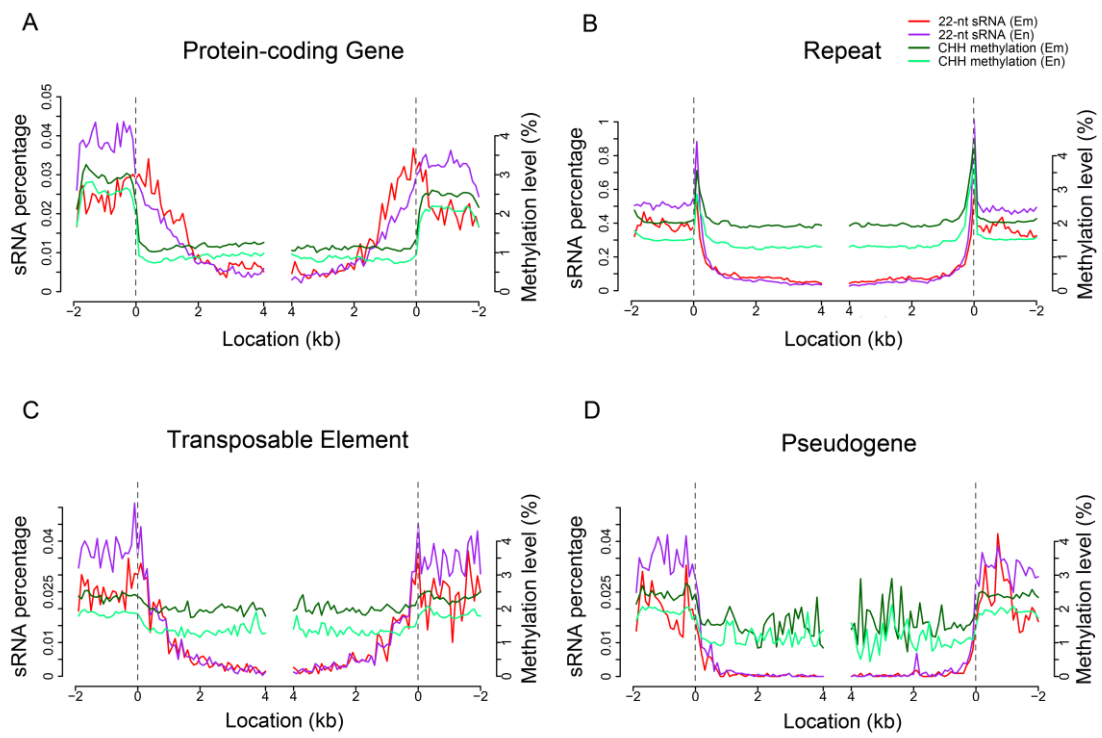

Figure H. Correlation between 22-nt sRNA and CHH methylation.



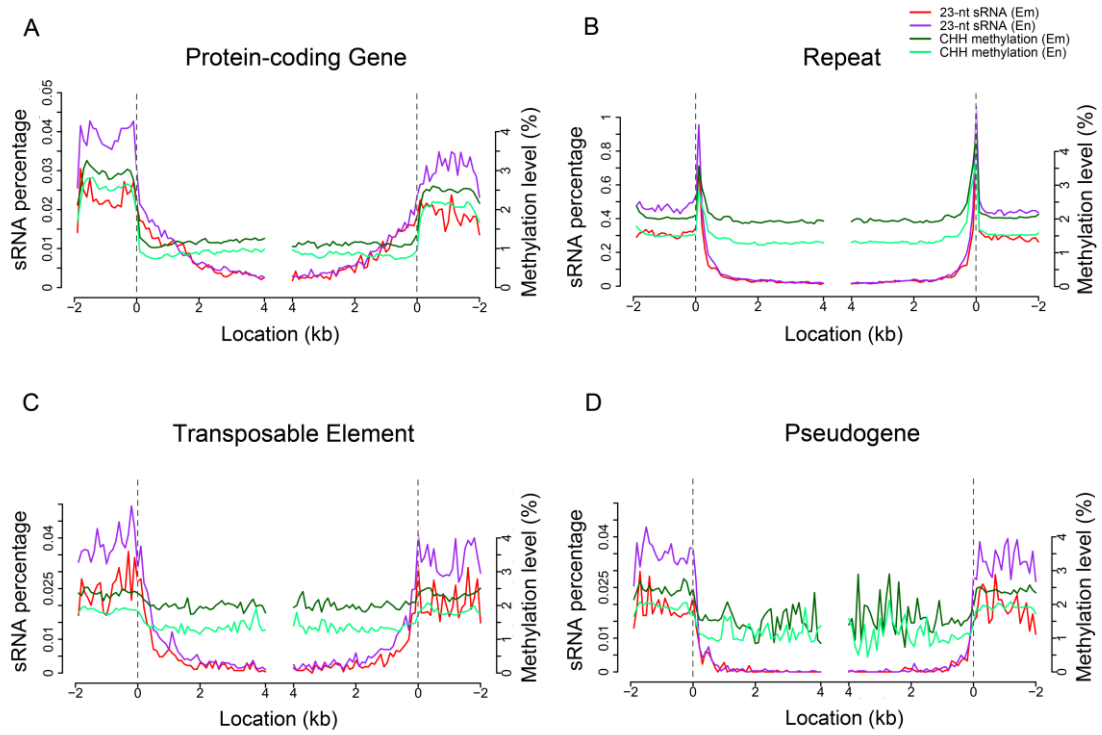

Figure I. Correlation between 23-nt sRNA and CHH methylation.

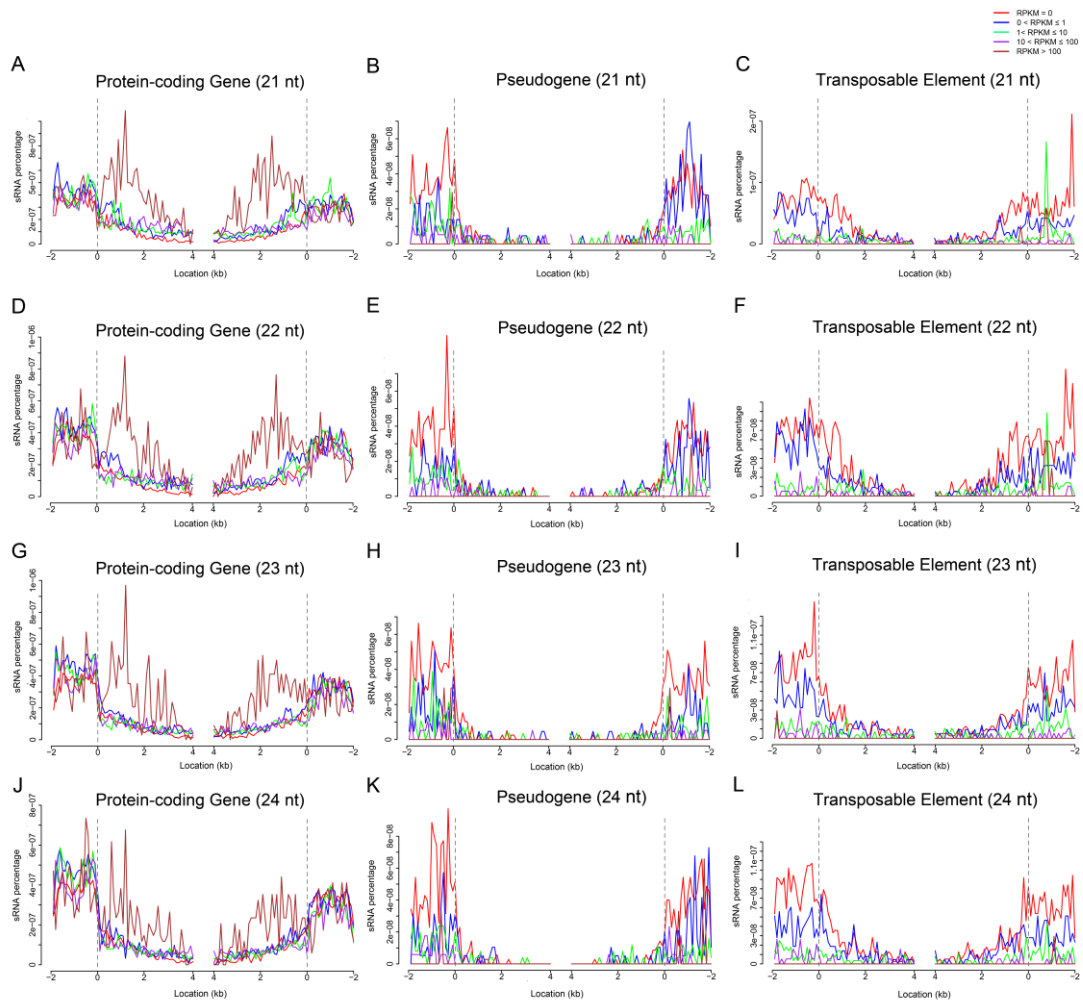

Figure J. sRNA associated with gene expression in the endosperm.

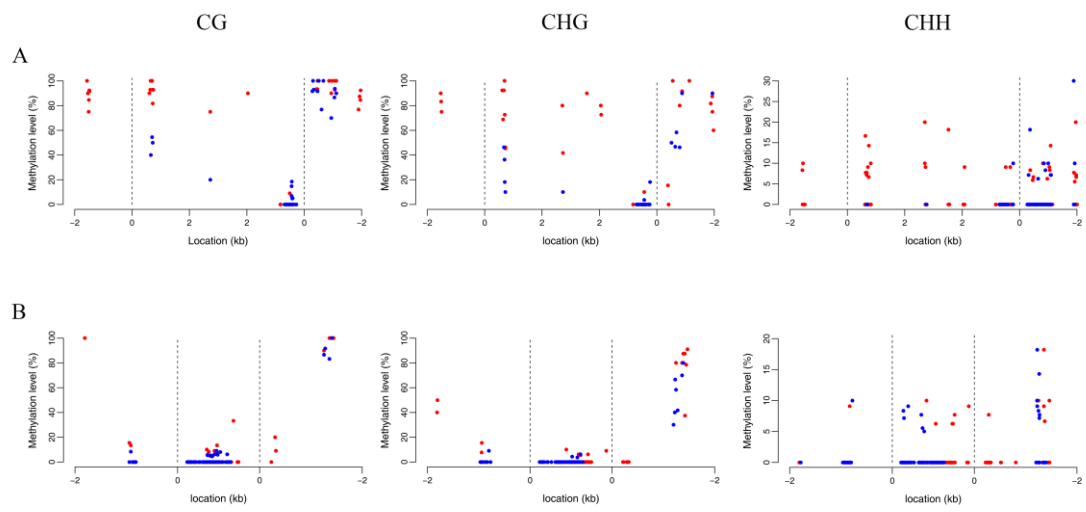

Figure K. DNA methylation patterns of *Fiel* and *floury-1*.

Table A. Statistics of DNA methylation in embryo and endosperm.

|                                                                           | Em         | En         |
|---------------------------------------------------------------------------|------------|------------|
| Sequences analysed in total                                               | 433715164  | 456749505  |
| Number of alignments with a unique best hit from the different alignments | 165285422  | 191527272  |
| Mapping efficiency                                                        | 38.11%     | 41.93%     |
| Sequences with no alignments under any condition                          | 75173762   | 40418137   |
| Sequences did not map uniquely                                            | 193255980  | 224804096  |
| Total number of C's analysed                                              | 2936910521 | 3523921294 |
| Total methylated C's in CG context                                        | 489026492  | 627830436  |
| Total methylated C's in CHG context                                       | 340570370  | 381748585  |
| Total methylated C's in CHH context                                       | 44995351   | 37574000   |
| Total C to T conversions in CG context                                    | 120261124  | 172940175  |
| Total C to T conversions in CHG context                                   | 193182776  | 281062348  |
| Total C to T conversions in CHH context                                   | 1748874408 | 2022765750 |
| C methylated in CG context                                                | 80.26%     | 78.40%     |
| C methylated in CHG context                                               | 63.81%     | 57.60%     |
| C methylated in CHH context                                               | 2.51%      | 1.82%      |

Table B. Methylation fraction distribution in embryo and endosperm.

|                         |               | Em          |          |               | En        |          |           |
|-------------------------|---------------|-------------|----------|---------------|-----------|----------|-----------|
|                         |               | CG          | CHG      | CHH           | CG        | CHG      | CHH       |
| 0%                      | Antisense     | 4293503     | 5087086  | 86323407      | 4504135   | 5117335  | 90991236  |
|                         | Sense         | 4289768     | 5084141  | 86291308      | 4500938   | 5117235  | 90964097  |
|                         | Total         | 8583271     | 10171227 | 172614715     | 9005073   | 10234570 | 181955333 |
|                         | %             | 13.04%      | 17.32%   | 86.61%        | 12.12%    | 16.08%   | 88.73%    |
| 1%-20%                  | Antisense     | 389175      | 886309   | 9765575       | 444508    | 1491972  | 9289758   |
|                         | Sense         | 389150      | 883665   | 9756451       | 445078    | 1491070  | 9280830   |
|                         | Total         | 778325      | 1769974  | 19522026      | 889586    | 2983042  | 18570588  |
|                         | %             | 1.18%       | 3.01%    | 9.79%         | 1.20%     | 4.69%    | 9.06%     |
| 21%-40%                 | Antisense     | 170451      | 1645333  | 3008691       | 322707    | 3046446  | 1916164   |
|                         | Sense         | 170198      | 1644564  | 3002570       | 322269    | 3045821  | 1915110   |
|                         | Total         | 340649      | 3289897  | 6011261       | 644976    | 6092267  | 3831274   |
|                         | %             | 0.52%       | 5.60%    | 3.02%         | 0.87%     | 9.57%    | 1.87%     |
| 41%-60%                 | Antisense     | 500437      | 3111204  | 456696        | 894823    | 4937833  | 266680    |
|                         | Sense         | 500761      | 3113820  | 455544        | 895674    | 4937415  | 267486    |
|                         | Total         | 1001198     | 6225024  | 912240        | 1790497   | 9875248  | 534166    |
|                         | %             | 1.52%       | 10.60%   | 0.46%         | 2.41%     | 15.52%   | 0.26%     |
| 61%-80%                 | Antisense     | 3399290     | 5921893  | 96065         | 4668486   | 7556542  | 69125     |
|                         | Sense         | 3396107     | 5916106  | 95576         | 4663807   | 7551327  | 68950     |
|                         | Total         | 6795397     | 11837999 | 191641        | 9332293   | 15107869 | 138075    |
|                         | %             | 10.32%      | 20.16%   | 0.10%         | 12.56%    | 23.74%   | 0.07%     |
| 81%-100%                | Antisense     | 24178240    | 12708026 | 27305         | 26334632  | 9672563  | 23903     |
|                         | Sense         | 24168352    | 12706728 | 27553         | 26307786  | 9668368  | 23547     |
|                         | Total         | 48346592    | 25414754 | 54858         | 52642418  | 19340931 | 47450     |
|                         | %             | 73.42%      | 43.29%   | 0.03%         | 70.85%    | 30.39%   | 0.02%     |
| Total                   | Antisense     | 32931096    | 29359851 | 99677739      | 37169291  | 31822691 | 102556866 |
|                         | Sense         | 32914336    | 29349024 | 99629002      | 37135552  | 31811236 | 102520020 |
|                         | Total         | 65845432    | 58708875 | 199306741     | 74304843  | 63633927 | 205076886 |
| Total C detected        | Antisense     | 161968686   |          |               | 171548848 |          |           |
|                         | Sense         | 161892362   |          |               | 171466808 |          |           |
|                         | total         | 323861048   |          |               | 343015656 |          |           |
| Total C analysed        | 2,936,910,521 |             |          | 3,523,921,294 |           |          |           |
| Coverage depth          | 9.07          |             |          | 10.27         |           |          |           |
| Total C in maize genome | Antisense     | 481,515,233 |          |               |           |          |           |
|                         | Sense         | 481,097,011 |          |               |           |          |           |
| % coverage              | Antisense     | 33.64%      |          |               | 35.63%    |          |           |
|                         | Sense         | 33.65%      |          |               | 35.64%    |          |           |

Table C. DMR distribution in Embryo and Endosperm.

| Annotation             |            | CHG    |       |        |       | CHH   |       |       |       | CG    |       |       |       |
|------------------------|------------|--------|-------|--------|-------|-------|-------|-------|-------|-------|-------|-------|-------|
|                        |            | OB     |       | OT     |       | OB    |       | OT    |       | OB    |       | OT    |       |
| Class                  | type       | +      | -     | +      | -     | +     | -     | +     | -     | +     | -     | +     | -     |
| Type I Transposon/LTR  | Gypsy      | 129425 | 35847 | 130138 | 36030 | 71452 | 44096 | 72382 | 44105 | 59161 | 30510 | 59201 | 30571 |
|                        | Unknown    | 38770  | 11734 | 38131  | 11280 | 23818 | 14845 | 23879 | 14609 | 18090 | 9740  | 17848 | 9379  |
|                        | Copia      | 51710  | 11533 | 51205  | 11487 | 38405 | 21609 | 37772 | 21258 | 22910 | 11270 | 22165 | 11217 |
| Type II Transposon/TIR | Tc1        | 111    | 27    | 84     | 27    | 163   | 84    | 165   | 98    | 101   | 41    | 115   | 38    |
|                        | CACTA      | 10578  | 3298  | 10505  | 3288  | 7329  | 4308  | 7289  | 4262  | 5021  | 3247  | 5244  | 3221  |
|                        | Mutator    | 4361   | 1318  | 4297   | 1277  | 3189  | 1809  | 3205  | 1779  | 2287  | 994   | 2240  | 958   |
|                        | hAT        | 3007   | 1106  | 3197   | 1057  | 2712  | 1462  | 2799  | 1502  | 1594  | 833   | 1645  | 754   |
|                        | Pif        | 1386   | 452   | 1387   | 503   | 1236  | 753   | 1268  | 854   | 814   | 378   | 851   | 316   |
| Type I Transposon/LINE | Unknown    | 1181   | 486   | 1156   | 489   | 983   | 619   | 977   | 638   | 703   | 344   | 723   | 334   |
|                        | L1         | 147    | 62    | 114    | 36    | 120   | 69    | 94    | 56    | 77    | 48    | 68    | 20    |
| Transposable Element   | upstream   | 5040   | 1348  | 4658   | 1331  | 3374  | 1926  | 3243  | 1872  | 2554  | 1140  | 2356  | 1050  |
|                        | gene body  | 3601   | 808   | 3415   | 849   | 2194  | 1247  | 2153  | 1150  | 1878  | 660   | 1739  | 690   |
|                        | downstream | 4356   | 1242  | 4317   | 1163  | 3118  | 1694  | 2998  | 1711  | 2202  | 1059  | 2175  | 1009  |
| Pseudogene             | upstream   | 2774   | 787   | 2859   | 744   | 2314  | 1226  | 2297  | 1266  | 1634  | 614   | 1591  | 588   |
|                        | gene body  | 628    | 187   | 661    | 168   | 537   | 309   | 517   | 277   | 365   | 135   | 378   | 120   |
|                        | downstream | 2745   | 746   | 2752   | 757   | 2325  | 1211  | 2330  | 1258  | 1642  | 599   | 1664  | 613   |
| Protein-coding gene    | upstream   | 11229  | 3776  | 11617  | 3872  | 10091 | 5849  | 10511 | 6009  | 6537  | 2755  | 6648  | 2693  |
|                        | gene body  | 12397  | 4217  | 12611  | 4510  | 16165 | 9804  | 16706 | 10127 | 11864 | 3833  | 11730 | 3766  |
|                        | downstream | 9621   | 3278  | 9636   | 3408  | 9571  | 5365  | 9564  | 5502  | 6038  | 2334  | 5980  | 2391  |

Table D. Statistics of DMR between embryo and endosperm.

|        |           |        | Site number | Base number |
|--------|-----------|--------|-------------|-------------|
| CG     | Antisense | +      | 285017      | 16867200    |
|        |           | -      | 136120      | 7474400     |
|        | Total     |        | 421137      | 24341600    |
|        | % of +    |        | 67.68%      | 69.29%      |
|        | Sense     | +      | 281796      | 16700200    |
|        |           | -      | 133694      | 7341750     |
| Total  |           | 415490 | 24041950    |             |
| % of + |           | 67.82% | 69.46%      |             |
| CHG    | Antisense | +      | 580449      | 38747900    |
|        |           | -      | 157885      | 8654600     |
|        | Total     |        | 738334      | 47402500    |
|        | % of +    |        | 78.62%      | 81.74%      |
|        | Sense     | +      | 578949      | 38707150    |
|        |           | -      | 157313      | 8627900     |
| Total  |           | 736262 | 47335050    |             |
| % of + |           | 78.63% | 81.77%      |             |
| CHH    | Antisense | +      | 364486      | 20285400    |
|        |           | -      | 213228      | 11373300    |
|        | Total     |        | 577714      | 31658700    |
|        | % of +    |        | 63.09%      | 64.08%      |
|        | Sense     | +      | 364239      | 20313750    |
|        |           | -      | 212770      | 11350950    |
| Total  |           | 577009 | 31664700    |             |
| % of + |           | 63.13% | 64.15%      |             |

“+” represents that the DMR is highly methylated in embryo, whereas “-” means the DMR is highly methylated in endosperm.

Table E. Gene expression in embryo and endosperm.

| Gene name      | Transcript ID     | RPKM |       |
|----------------|-------------------|------|-------|
|                |                   | Em   | En    |
| <i>Fiel</i>    | GRMZM2G118205_T01 | 0.08 | 27.24 |
| <i>Floury1</i> | GRMZM2G094532_T01 | 0.74 | 20.47 |
